# Supplementary material for: Autologous Microfragmented Adipose Tissue for the Treatment of Knee Osteoarthritis: Real-World Data at Two Years Follow-Up
Source: MDPI journal article supplement (doi:10.3390/jcm11051268), 2022-02-25
Supplement: s1 [file s1]

**Supplementary Table S1.** Values of KOOS and VAS in patients with different KL grade OA during the study period.

| <b>KOOS</b> |                         |                         |                         |                         |
|-------------|-------------------------|-------------------------|-------------------------|-------------------------|
|             | Pre-operative           | 6 months                | 12 months               | 24 months               |
| KL1         | 59.74 (46.14 - 68.46)   | 67.18 (44.99 - 79.69)   | 76.79 (61.9 - 86.31)    | 83.63 (68.01 - 94.79)   |
| KL2         | 52.2 ( 35.62 - 63.63 )  | 58.24 ( 43.71 - 72.02 ) | 73.15 ( 56.57 - 86.61 ) | 77.38 ( 61.9 - 88.1 )   |
| KL3         | 46.85 ( 33.74 - 62.44 ) | 63.42 ( 54.01 - 75.47 ) | 77.37 ( 58.26 - 86.78 ) | 80.36 ( 69.94 - 84.97 ) |
| KL4         | 45.05 ( 35.67 - 56.14 ) | 61.43 ( 49.26 - 68.34 ) | 68.45 ( 54.79 - 82.74 ) | 64.29 ( 40.48 - 70.83 ) |
| <b>VAS</b>  |                         |                         |                         |                         |
|             | Pre-operative           | 6 months                | 12 months               | 24 months               |
| KL1         | 5 ( 2 - 6 )             | 0 ( 0 - 2 )             | 2 ( 0 - 4.65 )          | 5 ( 3.35 - 7.15 )       |
| KL2         | 6 ( 3 - 7 )             | 2 ( 1 - 3 )             | 2.5 ( 0 - 6 )           | 7 ( 3.1 - 7.8 )         |
| KL3         | 4 ( 1.5 - 7 )           | 0.5 ( 0 - 2 )           | 3 ( 0 - 5.7 )           | 3.9 ( 2.8 - 7.5 )       |
| KL4         | 6.5 ( 4 - 7.75 )        | 1 ( 0 - 4.25 )          | 4 ( 2.4 - 5.5 )         | 6.5 ( 6 - 8.3 )         |

Data reported as median (interquartile range). KL1 n=80, KL2 n=46, KL3 n=32, KL4 n=19.
